# Supplementary material
Source: PubMed Central journal article supplement (PMC7762710)
Supplement: mmc1.pdf [file mmc1.pdf]

**Cell Host & Microbe, Volume 29**

## **Supplemental Information**

### **Induction of alarmin S100A8/A9**

**mediates activation of aberrant neutrophils**

**in the pathogenesis of COVID-19**

**Qirui Guo, Yingchi Zhao, Junhong Li, Jiangning Liu, Xiuhong Yang, Xuefei Guo, Ming Kuang, Huawei Xia, Zeming Zhang, Lili Cao, Yujie Luo, Linlin Bao, Xiao Wang, Xuemei Wei, Wei Deng, Nan Wang, Luoying Chen, Jingxuan Chen, Hua Zhu, Ran Gao, Chuan Qin, Xiangxi Wang, and Fuping You**

## **Supplemental Information**

**Figure S1.** Antiviral innate immune disorder in the early stage of SARS-CoV-2 infection. (Related to Figure 1)

**Figure S2.** Analysis of the differences between coronavirus and influenza a virus infection. (Related to Figure 2)

**Figure S3.** Analysis of immune characteristics of mouse coronavirus MHV-A59 infection. (Related to Figure 2)

**Figure S4.** Aberrant neutrophils are closely associated with fatal coronavirus infection. (Related to Figure 3)

**Figure S5.** Analysis of the efficacy of Paquinimod in rescuing mice infected with coronavirus. (Related to Figure 4)

**Figure S6.** An attempt to treat mice infected with coronavirus via Azeliragon. (Related to Figure 5)

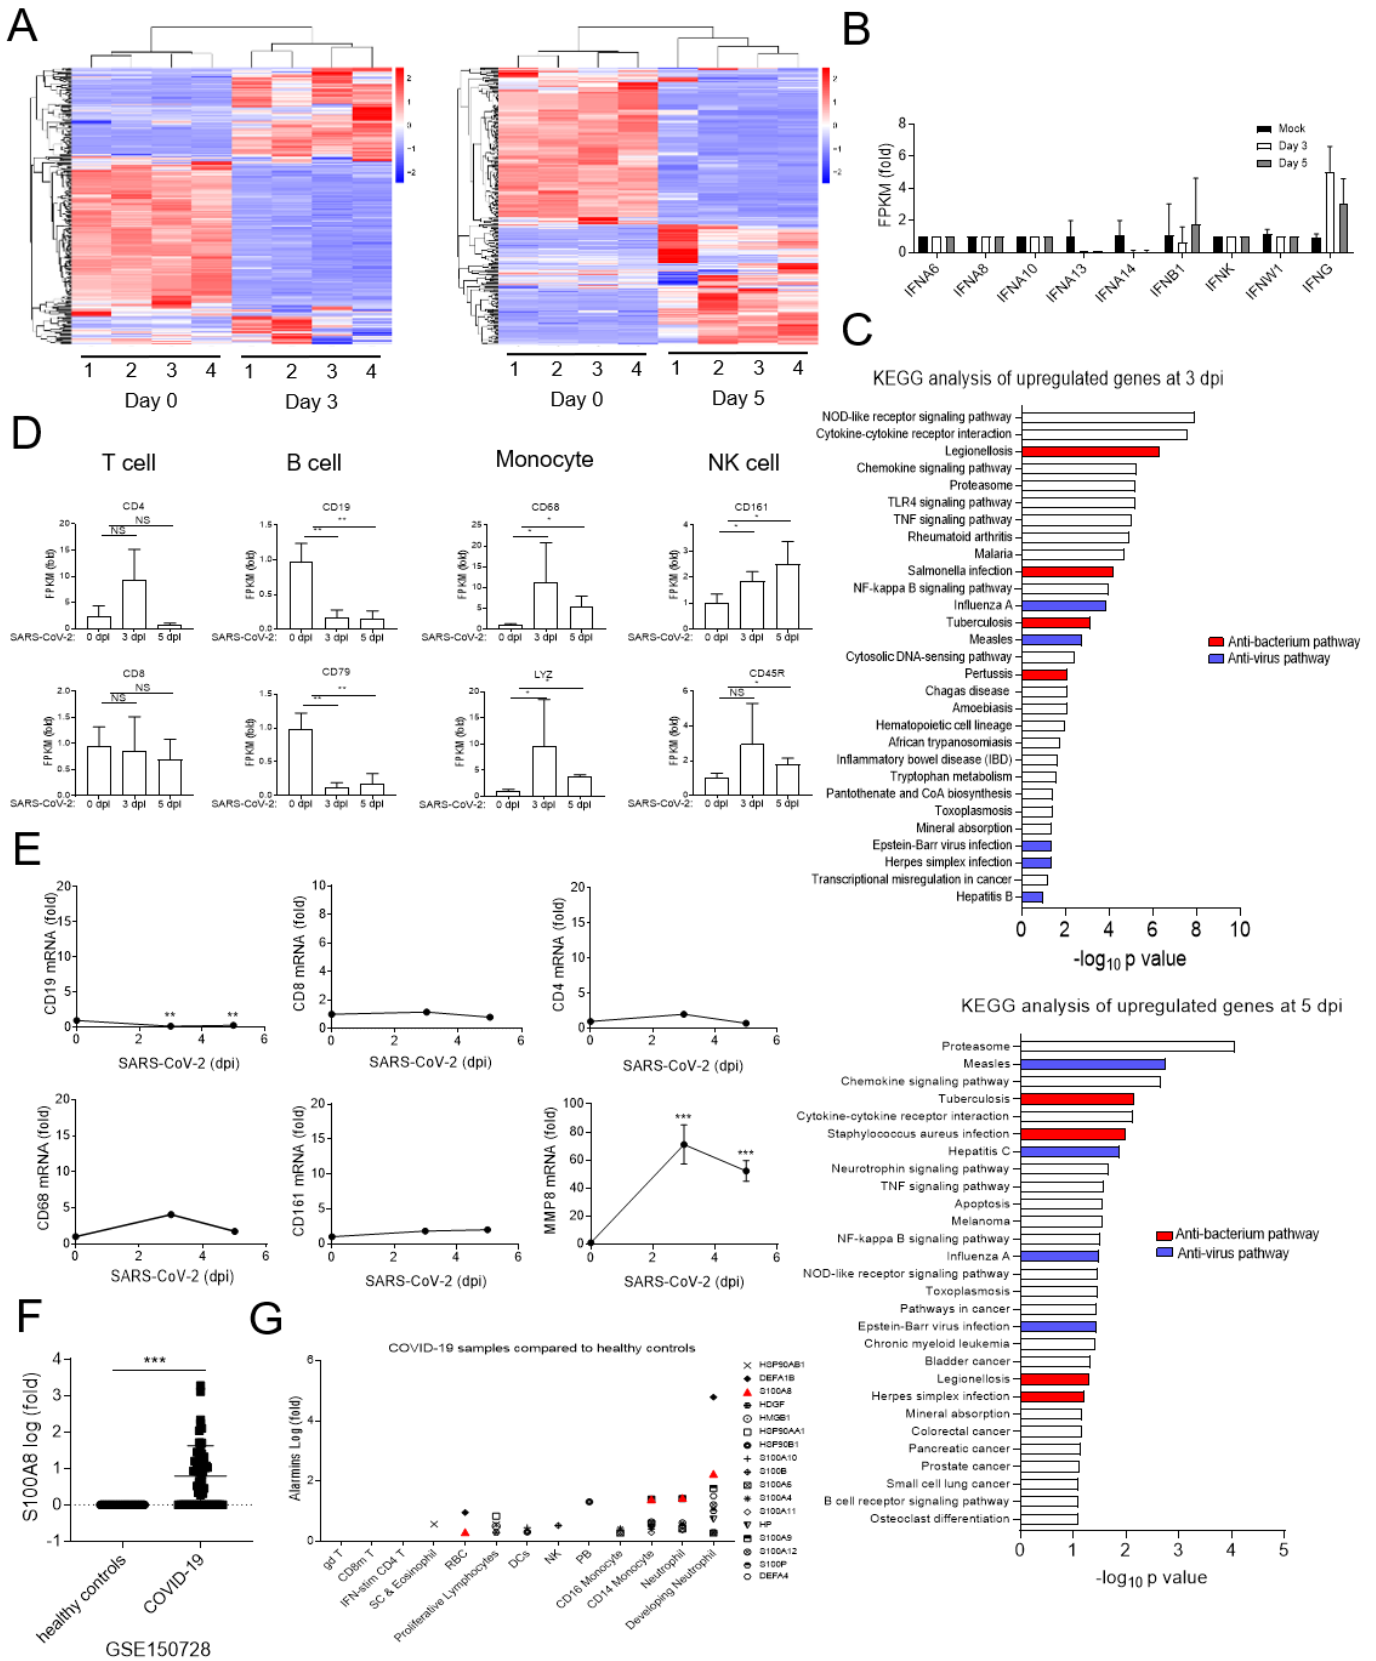

**Figure S1. Antiviral innate immune disorder in the early stage of SARS-CoV-2 infection. (Related to Figure 1)**

**(A)** Heat map depicting the differentially expressed genes in the lungs of rhesus macaques infected with SARS-CoV-2 at 3 dpi and 5 dpi. **(B)** The expression of IFNs was analyzed in the lungs of rhesus macaques infected with SARS-CoV-2 at 3 dpi and 5 dpi. **(C)** KEGG analysis of the differences in rhesus macaques infected with SARS-CoV-2 compared with Mock. **(D)** The expression of indicated marker genes was analyzed.

$n = 4$ . **(E)** qRT-PCR analysis of indicated marker genes in the lungs of SARS-CoV-2-infected rhesus macaques at 0 dpi, 3 dpi and 5 dpi.  $n=3$ . **(F)-(G)** Analysis of *S100A8* (F) and alarmins (G) expression in peripheral blood from healthy control and COVID-19 patients. Fold change (FC) to healthy control (log10). Data from the peripheral blood of COVID-19 patients and healthy control correspond to GEO: GSE150728. (\*P < 0.05; \*\*P < 0.01; \*\*\*P < 0.001).

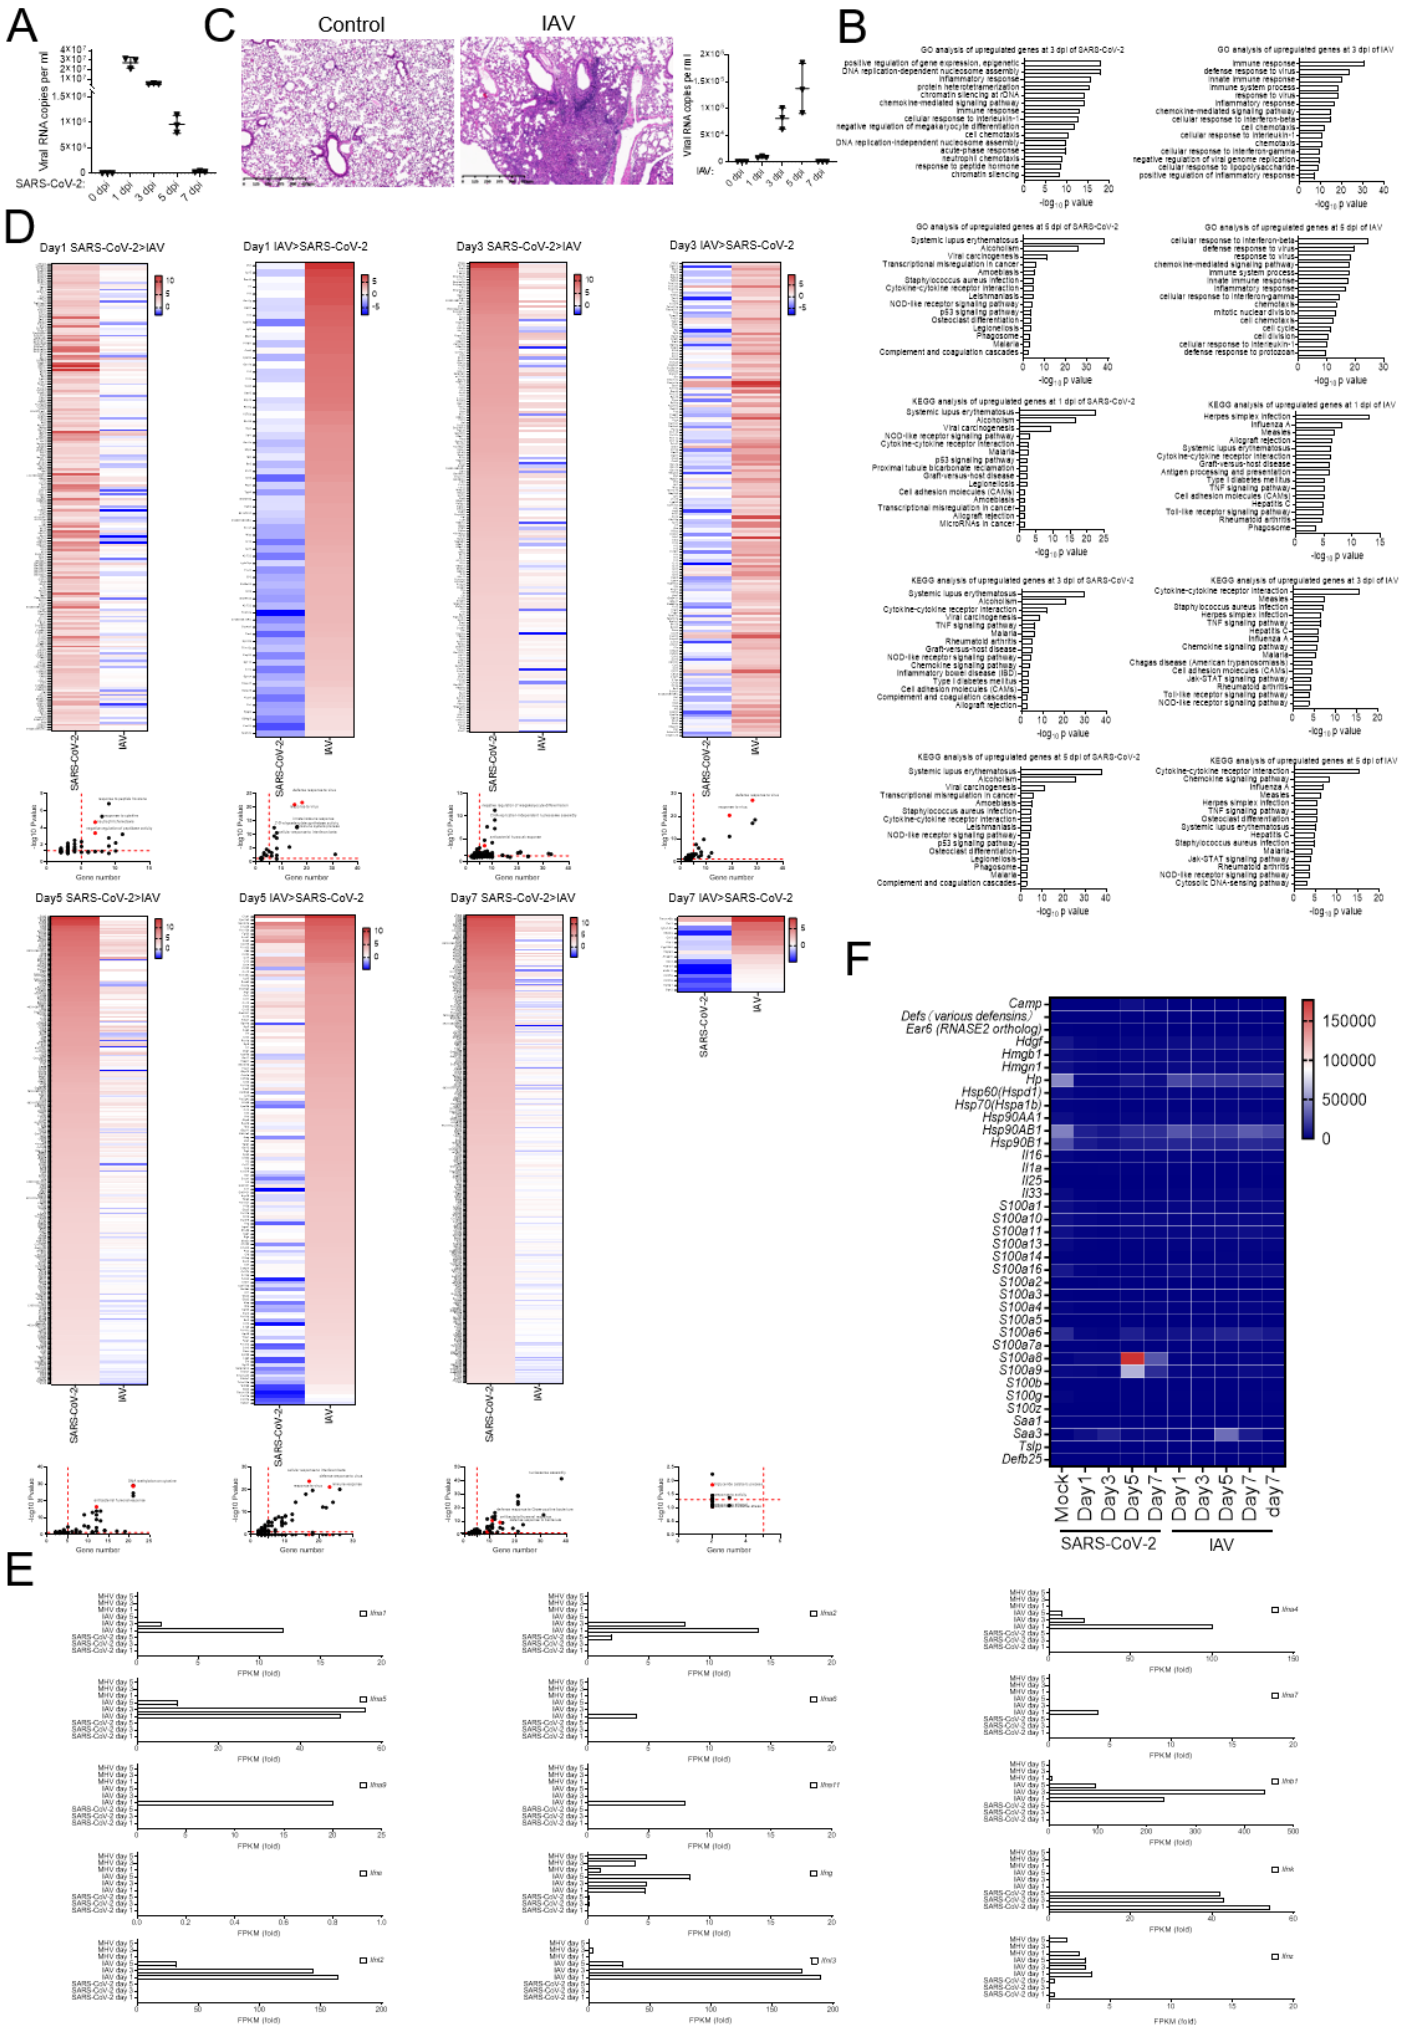

**Figure S2. Analysis of the differences between coronavirus and influenza a virus infection. (Related to Figure 2)**

**(A)** qRT-PCR analysis for viral loads in the lungs of *hACE2* mice infected with SARS-CoV-2. *n*=3. **(B)** RNA-seq analysis of lungs in IAV- and SARS-CoV-2-infected mice at different points in time. GO and KEGG analysis were performed with the differentially expressed genes compared with Mock ( $FC > 4$  or  $< 0.25$ ,  $P$  value  $< 0.05$ ). **(C)** Identification of a mouse model of pneumonia infected with IAV virus. H&E staining of the lung in mice infected with IAV at 5 dpi showed that lots of lymphocytes were infiltrating into the lungs and the lung tissue was obviously fibrotic. qRT-PCR analysis showed that IAV virus amplified effectively in the lung tissue. *n*=3. **(D)** GO and KEGG analysis was performed with the differentially expressed genes between IAV and SARS-CoV-2 infection ( $FC > 4$  or  $< 0.25$ ,  $P$  value  $< 0.05$ ). **(E)** The expression of *IFNs* was analyzed by the RNA-seq data on lungs of mice infected by IAV, MHV or SARS-CoV-2. **(F)** Heat map depicting the expression of alarmins in the lungs of mice infected with IAV and SARS-CoV-2 at successive time points after infection.

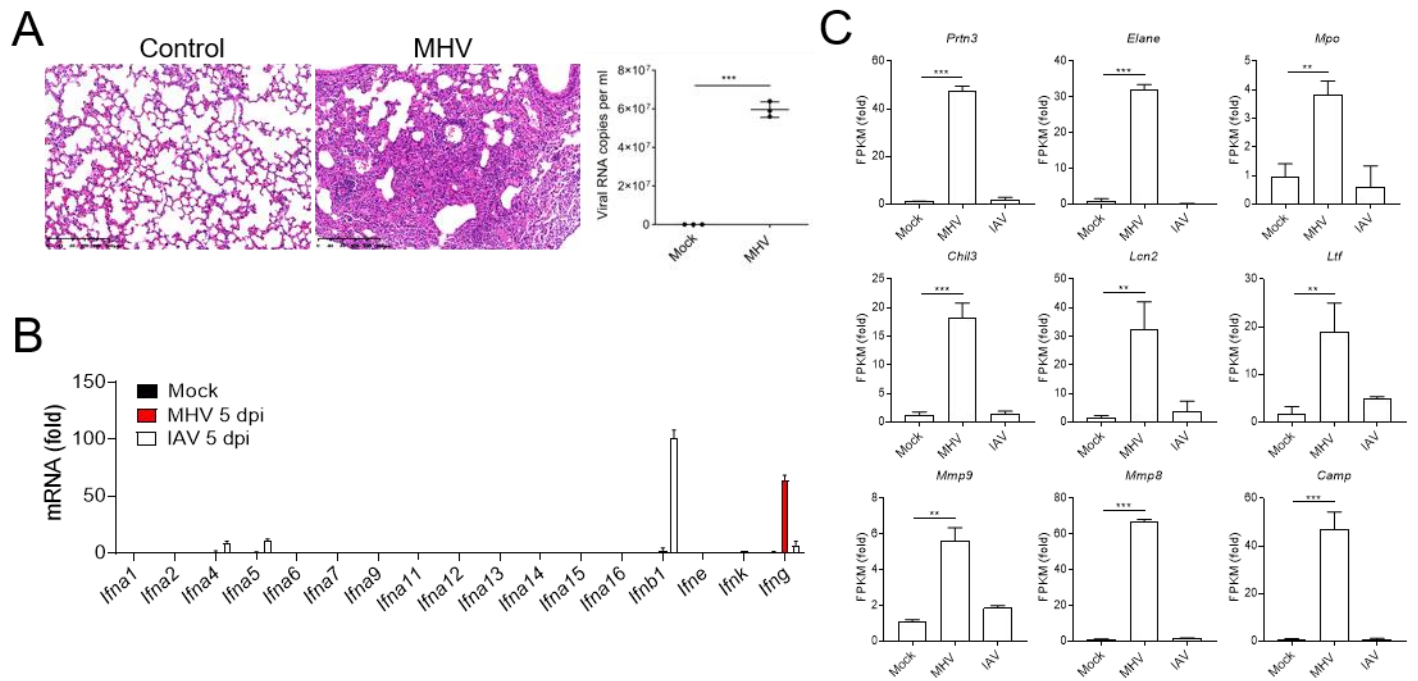

**Figure S3. Analysis of immune characteristics of mouse coronavirus MHV-A59 infection. (Related to Figure 2).**

(A) Identification of a mouse model of pneumonia infected with MHV virus. H&E staining of the lung in mice infected with MHV at 5 dpi showed significant pulmonary fibrosis. qRT-PCR analysis showed that MHV virus amplified significantly in the lung of mice.  $n=3$ . (B)-(C) The expression of *IFNs* (H) and neutrophil maker genes (I) in the lungs of mice infected with IAV or MHV at 5 dpi were analyzed using RNA-seq data (FC to Mock). (\*\* $P < 0.01$ ; \*\*\* $P < 0.001$ ).

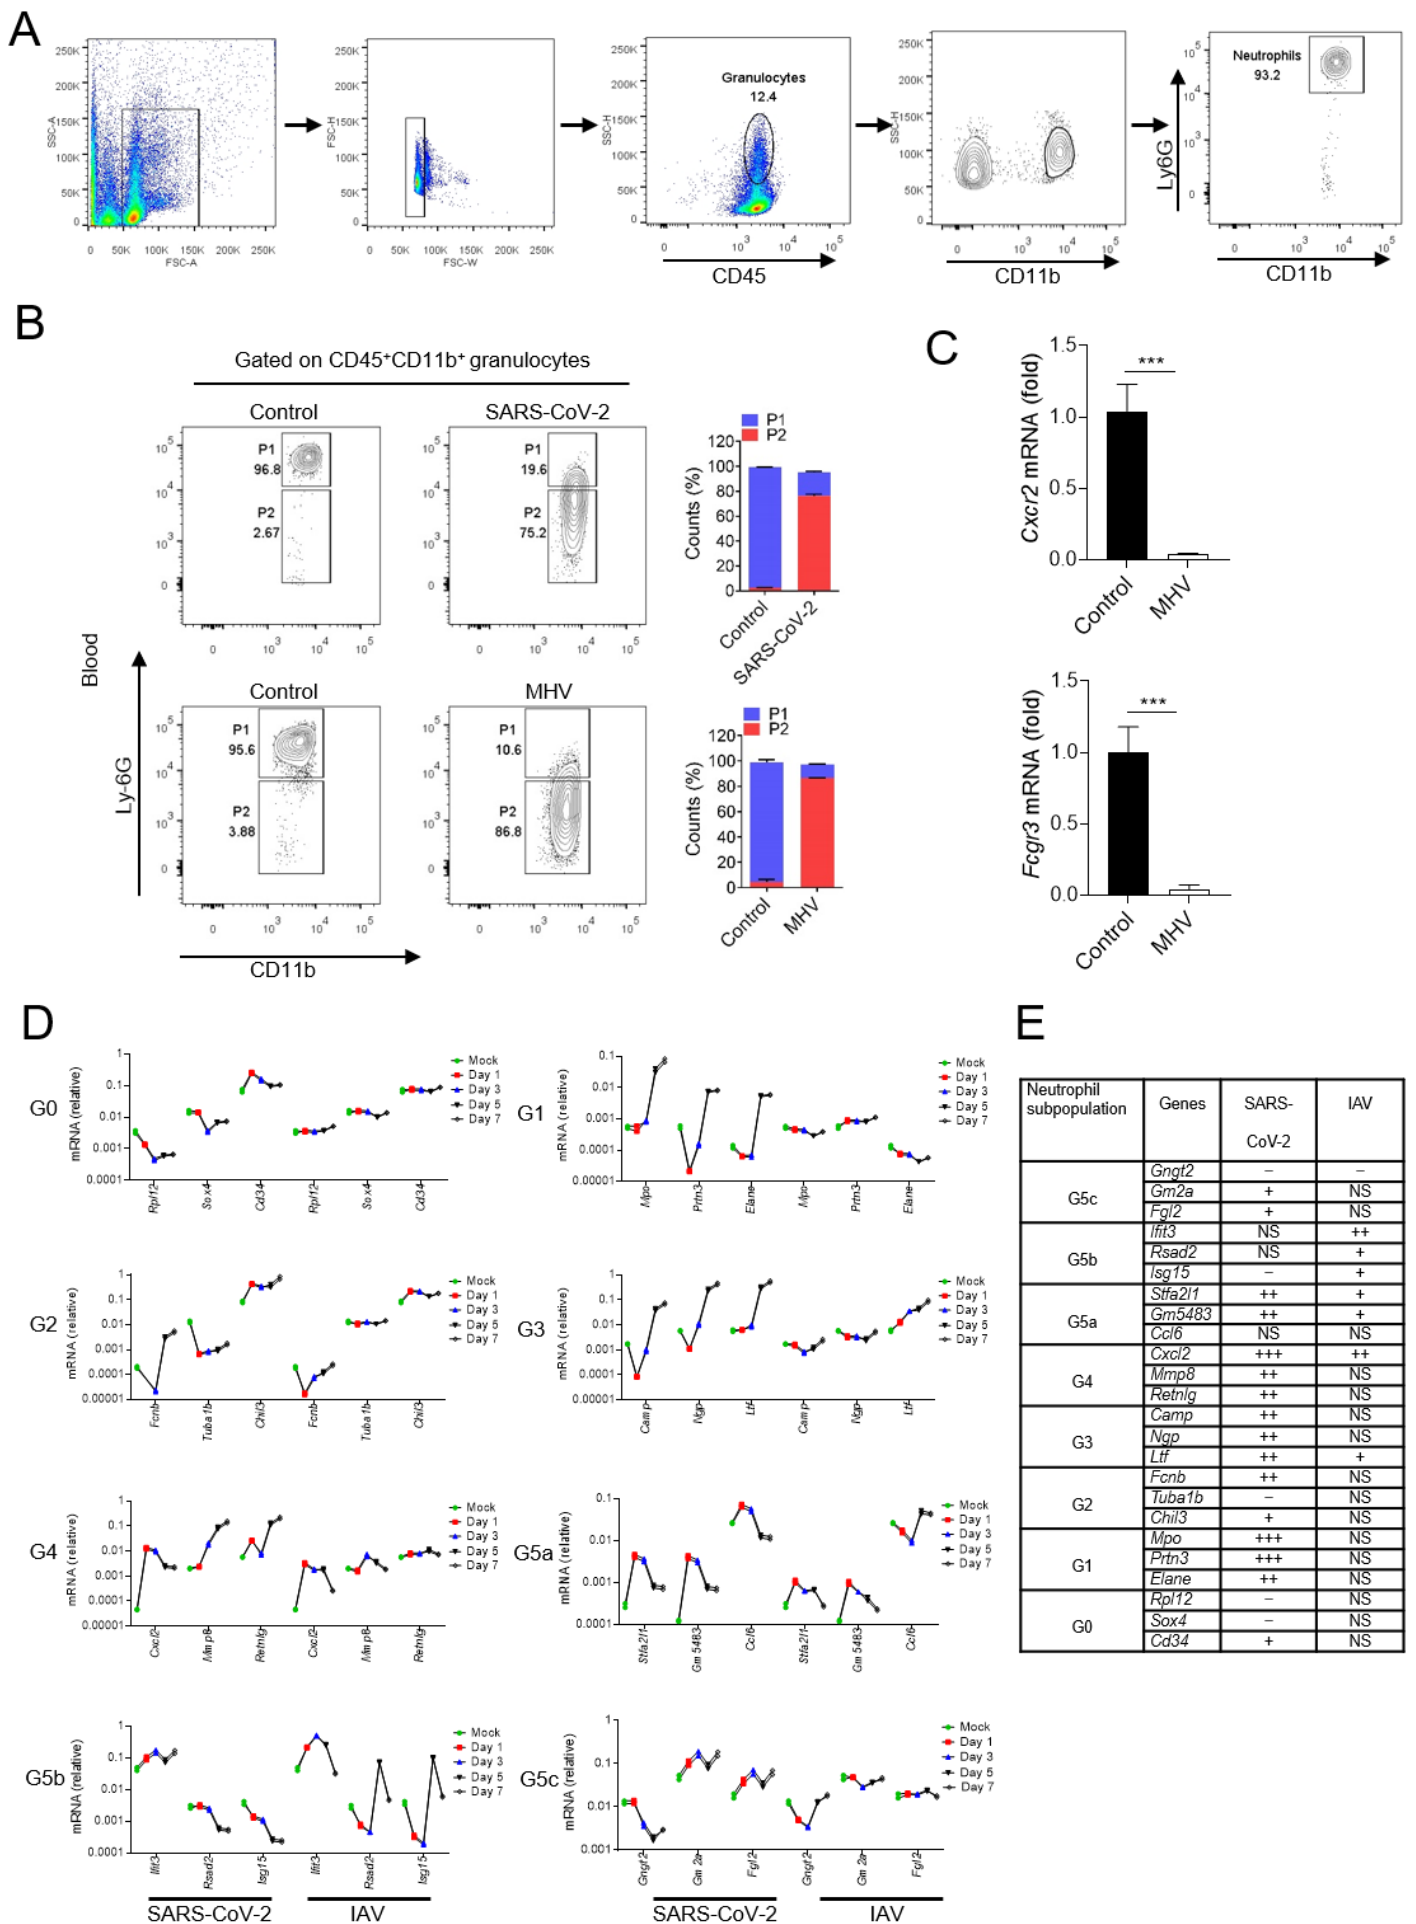

Figure S4. Aberrant neutrophils are closely associated with fatal coronavirus infection. (Related to Figure

3)



**(A)** A flow chart depicting the gating scheme of neutrophils. **(B)** Flow cytometry analysis of neutrophils in blood from mice infected with SARS-CoV-2 and MHV at 5 dpi. Gate P1 shows the conventional neutrophils (CD45<sup>+</sup>CD11b<sup>+</sup>Ly6G<sup>high</sup>), and Gate P2 shows the pathologic aberrant neutrophils (CD45<sup>+</sup>CD11b<sup>+</sup>Ly6G<sup>variable</sup>). Aberrant neutrophils (P2) in the blood of mice infected with coronavirus were significantly increased.  $n = 3$ . **(C)** qRT-PCR analysis for the expression of mature neutrophil marker genes *Fcgr3* and *Cxcr2* in aberrant neutrophils of bone marrow.  $n = 3$ . **(D)-(E)** RNA-seq analysis for related genes of neutrophil differentiation subgroup from the lungs of mice infected with SARS-CoV-2 or IAV. (\*\*\*) $P < 0.001$ .

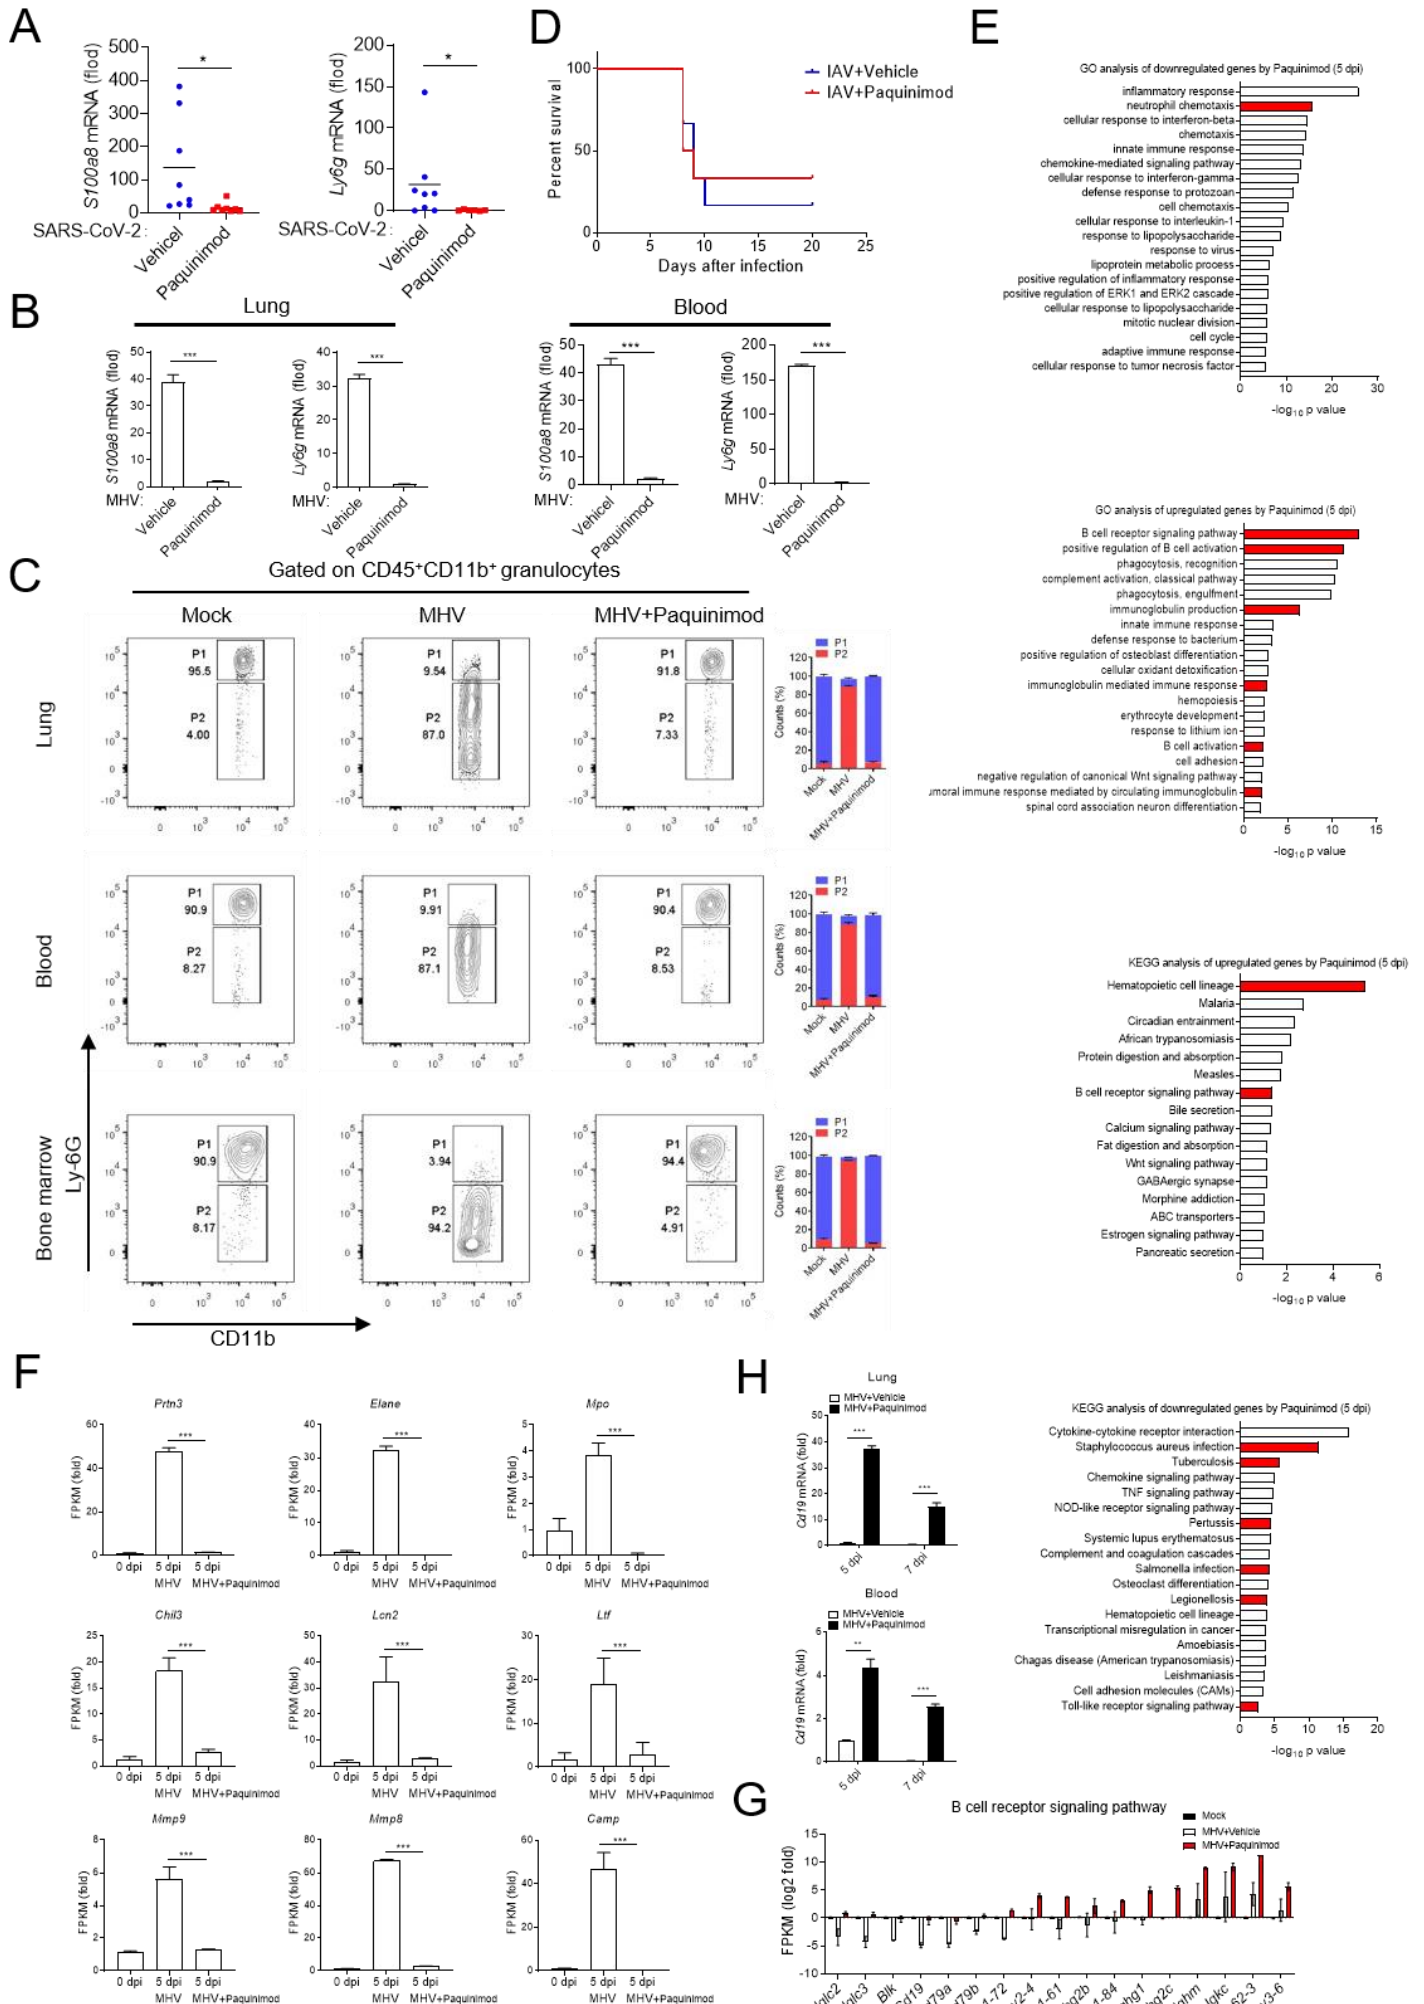

**Figure S5. Analysis of the efficacy of Paquinimod in rescuing mice infected with coronavirus. (Related to Figure 4)**

(A) qRT-PCR analysis for the expression of *S100a8* and *Ly6g* in the blood of mice infected with SARS-CoV-2 at 5 dpi after Paquinimod treatment.  $n \geq 5$ . (B) qRT-PCR analysis for the expression of *S100a8* and *Ly6g* in the lungs and blood of mice infected with MHV after Paquinimod treatment.  $n = 3$ . (C) Flow cytometry analysis of neutrophils in lungs, blood and bone marrow from mice infected with MHV at 5 dpi after Paquinimod treatment. Aberrant neutrophils (P2) in the mice infected with MHV were significantly decreased by Paquinimod treatment.  $n = 3$ . (D) Post-infection survival curves of wild type mice infected with IAV by Paquinimod treatment.  $n=6$ . (E) RNA-seq analysis for lungs of MHV-infected *Ifnar<sup>-/-</sup>* mice rescued by Paquinimod treatment at 5 dpi. GO and KEGG analysis was performed with the differentially expressed genes compared with control ( $FC > 4$  or  $< 0.25$ ,  $P$  value  $< 0.05$ ). Control group means MHV-infected *Ifnar<sup>-/-</sup>* mice treated with Vehicle. (F) The expression of neutrophil maker genes in the lungs of MHV-infected mice rescued by Paquinimod at 5 dpi were analyzed by RNA-seq data. (G)-(H) Analysis of the expression level of B cell related genes in the lungs and blood of MHV-infected mice rescued by Paquinimod.  $n = 3$ . (\* $P < 0.05$ ; \*\* $P < 0.01$ ; \*\*\* $P < 0.001$ ).

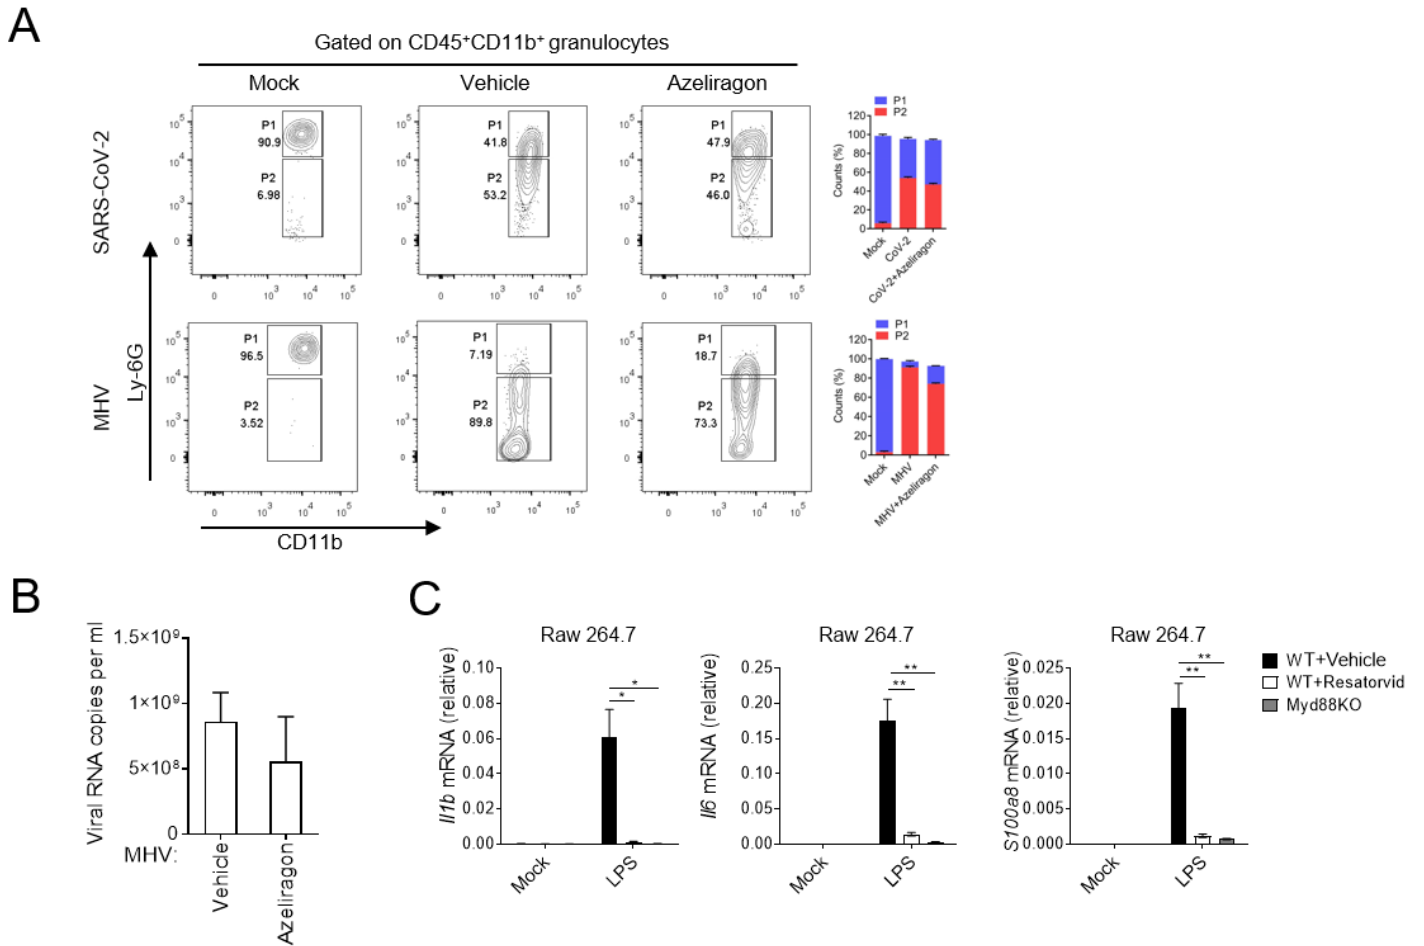

**Figure S6. An attempt to treat mice infected with coronavirus via Azeliragon. (Related to Figure 5)**

(A) Flow cytometry analysis of neutrophils in the lungs from mice infected with SARS-CoV-2 and MHV at 5 dpi after Azeliragon treatment.  $n = 3$ . (B) Analysis of viral loads in the lungs from MHV-infected mice at 5 dpi after Azeliragon treatment.  $n = 3$ . (C) Identified TLR4 signal response in the Raw 264.7 cells by qRT-PCR.  $n = 3$ . (\* $P < 0.05$ ; \*\* $P < 0.01$ ).
